# Supplementary material
Source: Springer Nature journal article supplement (https://www.springermedizin.de/resource/supplementary/12943_2009_619_MOESM6_ESM.pdf/9554416)
Supplement: MOESM6 [file 9554416]

↓**SspI**<sup>a</sup>  
human AATATTGGGATCCACCCTTCGGATGCGTGTGTTTTTATTTGCACCCTAAGTCAGCTACCTATAAA<sup>-1935</sup>  
mouse CTATATTTCAGAACAGCCCTTCTCTATGGATGGTTTCATTTGTACTACTA-CTAACTACCTATGAT<sup>-2248</sup>

human AAATGCCTTACTGTTTTAAAAGAGGCCAAAAATTTAAA<sup>-1898</sup>  
mouse GTAGGTATTCGACGGATGCCAATATGTCAGTAGTTTT<sup>-2211</sup>

TCF7L2 (TCF4)<sup>##</sup>  
human TTTTTTGTTTTAAAGGAGACTCTAGGGCTTAAGTCTTTTAAAGGATAAATTCCTCCCAA<sup>-1838</sup>  
mouse CTTTGTTTTAAAGGAGACTCTAGATTTTCAGGTCTTTC-AAGAAAAACACTTCTCCCAA<sup>-2152</sup>

human TGAACCTCTTAAAATTGAATTTTTGAA-----ATTTAAA-----TTGGGGGGAAAGGT<sup>-1791</sup>  
mouse TGATCCCTTTAAAATTAGGTTTTAAATGGAAAAATTTAAAAAAGACTAATAACAGACGT<sup>-2092</sup>

human ----TAAAT--CTAAGATTTATAATAGAATAAAATGATAAATG-----TGACT-<sup>-1749</sup>  
mouse GATTTGAATTC<sup>3</sup>CCAGATTGGGGCTTGAGAGATGGCTCAGTGGTTAAGAGCACTGACTG<sup>-2032</sup>-gap-

human -----CTTACATACTGAG--AATGAAGTATTGAAATAGTT--TGG<sup>-1713</sup>  
mouse GGGGGTCTGATGACCTCACACAGACATACTAAACCAACAGTGCACATAAAACAACAATGA<sup>-1912</sup>

human GAACAAA---TCTGTTC---ATTTAAAATGTTGAGTGCTAGTTTAAAATAGCCTGGTCAAT<sup>-1657</sup>  
mouse GCCCTAAACGTCAGTTTTTCAGATGAAGAGTGAGGATTGAATGTTTAAAGCGGGCTGGCCAAT<sup>-1850</sup>

human TACACAGATGGTTTCTTTTATTCTAGCAAGTA-----ATTAAAGCTTAATAAAAATAA<sup>-1605</sup>  
mouse TA--ACACGTTTTCTCTTATCCAAACGAGTTGATGAAGTAGTAAAATTTAACAAAGATAA<sup>-1793</sup>

GATA  
human -TATTTGTAAAGATAAAATTGAGCA-----TAAAAATACTGTTATGCTTCATAGC<sup>-1557</sup>-gap-  
mouse ATATTTGTGAAGATAAAATTCAGTACCTACCTAATTGAAACCCTGTT-TGCTTCACAGC<sup>-1736</sup>-gap-

human TATCCACTAGACCTCATTACAAGGTTATATT--CTCATATTATTTTACAGGATTATAAT<sup>-1467</sup>  
mouse AAACCAATAGCCGTCATCACTGGTTTTTATTATCTCAACATGTATTTACTGGGTCATAAT<sup>-1616</sup>

human TTCCTGAGG-CCAAACTACTGATCTAGGCTACTTACTAGCCTAGCAGACTCTTGCTAAA<sup>-1408</sup>  
mouse TTCCCAAGGGCCAGGACTTCTAATATAAACTGCTTAGTAACCCAGTGGACCTCTGCC-AA<sup>-1557</sup>

human AGGTAGACCAAGACAGTACCTTTGTTTGCCAGGTAGACCTGCTTGACAATTTGACTAAAA<sup>-1347</sup>  
mouse AGGTAGACAAAGGCAGTCTCTCTTTTGAAGGCAGACTGGCTTGAAGTGAAGTTTGA-<sup>-1497</sup>

human CTGATCATTTTACTTTAGAAATTGCTTTTCATGGGAGTAGTATATGACTTGTTAGATTCC<sup>-1287</sup>  
mouse TCATTTTACTTTTAAAGCTCCCTTTAT--GAGCACATATGACTTATTAGGCTCC<sup>-1431</sup>

human TTGTGCTGCTCTATCTTTTCACTGATAATGATTTTTCAGTTTTCATTTGCCATATGGGCT<sup>-1227</sup>  
mouse TTGTCTTGT-----GTTCACTAAGGAGGACTTGTGATTTCCATTTGTCTATGGGCT<sup>-1379</sup>

FOXD1, FOXJ2 ↓**EcoRV**<sup>a</sup>  
human GGCTGTTAAATAGGTAAACACAAAGGTAGATA--TCAATGTTATACATATGTCAAGTGG<sup>-1170</sup>-gap-  
mouse AGCTATCACATAGGTAAACAAGGAGACAGGTAAGGTTAACAGAAGCCCTGGGGAAGTGA<sup>-1319</sup>-gap-

human TATGATCA--GCTGGGAATTGTAAACTCAGAGAACAGTCCACAAAGTGTCAAAGGGTTAC<sup>-930</sup>  
mouse ATCAAGCATGGCTGGGAAGAGTTAAATTCAAAAAGAGTT----AAATTCAAAAGAGTTAC<sup>-1023</sup>

human TGCTTTATTAATTAATTTGTGTTGCTTACAGCAGTGTGAC-----CCAGCAACATT<sup>-878</sup>  
mouse TGATTTATTTGGTCAAAAATAGTGTATTTAGAAAGATGTGGGTCTCCAGACCAGCAGCATC<sup>-963</sup>

FOXA 1, 2  
human AGCACCAGAACTCTGAGAGTGCAGCCAGGAGTTTGTTTTAAACAAGTCTCCAGGTGGT<sup>-818</sup>  
mouse TGCCCCAAGAACTTCTGGTGTGGGGCCTAGCAATTTGTTTTTACTAGCCTTTTGGGTTAC<sup>-904</sup>
